# Supplementary material for: The sinking behavior of micro–nano particulate matter for bisphenol analogues in the surface water of an ecological demonstration zone, China
Source: Royal Society of Chemistry journal article supplement (doi:10.1039/d0em00366b), 2020-11-02
Supplement: d0em00366b1.pdf [file d0em00366b1.pdf]

Sinking behavior of micro-nano particulate matter for bisphenol analogues in the surface water of an ecological demonstration zone, China

Yuanfei Cai <sup>1,2</sup>, Jinghua Ren <sup>3</sup>, Zijian You <sup>1</sup>, Jianchao Liu <sup>1,\*</sup>, Guanghua Lu <sup>1</sup>, Yiping Li <sup>1</sup>, Junfeng Li <sup>4</sup>

<sup>1</sup> Key Laboratory of Integrated Regulation and Resources Development, College of Environment, Hohai University, Nanjing 210098, China

<sup>2</sup> Wanjiang University of Technology, Ma'anshan 243031, China

<sup>3</sup> Technology Innovation Center of Ecological Monitoring & Restoration Project on Land (arable), MNR Geological Survey of Jiangsu Province

<sup>4</sup> College of Water Conservancy and Architecture Engineering, Shihezi University, Shihezi 832000, Xinjiang, China

\* Correspondence: [jianchao-liu@hhu.edu.cn](mailto:jianchao-liu@hhu.edu.cn) (J.L.)

## **Contents**

2.4 Quality assurance and quality control

2.5 Parameter measurement and statistical analysis

**Figure S1.** Representative chromatogram of BPs at concentration of 10 µg/L.

**Table S1.** Geographic information of thirty-one sampling sites.

**Table S2.** Mobile phase compositions for the separation methods.

**Table S3.** Optimized MS/MS parameters for the five BPs.

**Table S4.** Recovery values obtained for the three independent concentrations of spiked quality control samples.

**Table S5.** Ecotoxicity data for BPs under study.

**Table S6.** RQ of each BP for algae, daphnids and fish.

## 2.4 Quality assurance and quality control

The extraction efficiency of BPs from the water samples was examined by a strict QA/QC protocol. With each set of samples to be analyzed, a solvent blank, a membrane and a procedure blank were run in sequence to check for background BPs, peak identification and quantification. The performance of analytical methods was evaluated in terms of linearity, Limits of detection (LOD) and quantification (LOQ) and recoveries. LOD and LOQ were determined as the minimum detectable amount of an analyte with a signal-to-noise (S/N) of 3 and 10, respectively. The linearity of the target compounds was also studied by injecting different concentrations (seven-point calibration curves) of standard solutions in the 1.0-200 ng/mL range ( $R^2 > 0.998$ ). To evaluate the recoveries of water and SPM, spiked samples were prepared using surface water and sediment of Yangtze River. Before use, the surface water sample and sediment used for recovery test was analyzed for the presence of BPs. The recovery data for BPs were corrected to account for this fact, i.e. average blank peak area of BPs was subtracted from average peak areas of other recovery points. Six independent chromatographic runs were carried out for each of two concentration levels. Obtained recoveries were presented in Table S4. Analysis of reagent blanks ( $n = 3$ ) demonstrated that the analytical system and glassware were free of BPs.

## 2.5 Parameter measurement and statistical analysis

The risk assessment of target compounds in the surface water was evaluated using the risk quotient (RQ) estimation. The  $RQ_{\text{Total}}$  was calculated as Eq (1).

$$RQ_{\text{Total}} = \frac{\sum \frac{MEC}{PNEC}}{\sum \frac{MEC}{EC50 \text{ or } LC50/f}} \quad (1)$$

where MEC and PNEC are the measured environmental concentration and the predicted no effect concentration. To estimate a PNEC on the basis of toxicity data when only the short-term/acute toxicity data  $EC_{50}$  or  $LC_{50}$  are available, the calculation of PNEC is obtained from the  $EC_{50}$  or  $LC_{50}$  divided by a security factor ( $f$ ) of 1000. Once the long-term/chronic NOEC values for one, two or three trophic levels are available, a  $f$  of 100, 50 or 10 is used (ECHA, 2008). The PNEC is derived from the chronic and acute toxicity data in literature by a  $f$  of 100 or 1000 in our study. The values of PNEC calculation for fish, daphnia and green algae were provided in the Table S6.

Calculation of the oestrogen equivalent concentration (EEQ) of a chemically determined mixture is based on all measured xenoestrogens with a known oestrogen equivalency factor (EEF; Table S6), as shown in the following equation (Eq (2)). Contaminants are thought to affect the endocrine systems of organisms in the water bodies when  $EEQ > 1.0 \text{ ng } E_2/L$ .

$$EEQ_{\text{Total}} = \sum EEQ_i = \sum (C_i \times EEF_i) \quad (2)$$

Where  $C_i$  refers to the compound  $i$  with concentration  $C$  in the truly dissolved phase,  $EEQ_{\text{Total}}$  is the total estradiol equivalent quantity and  $EEF_i$  is the estradiol equivalency factor.

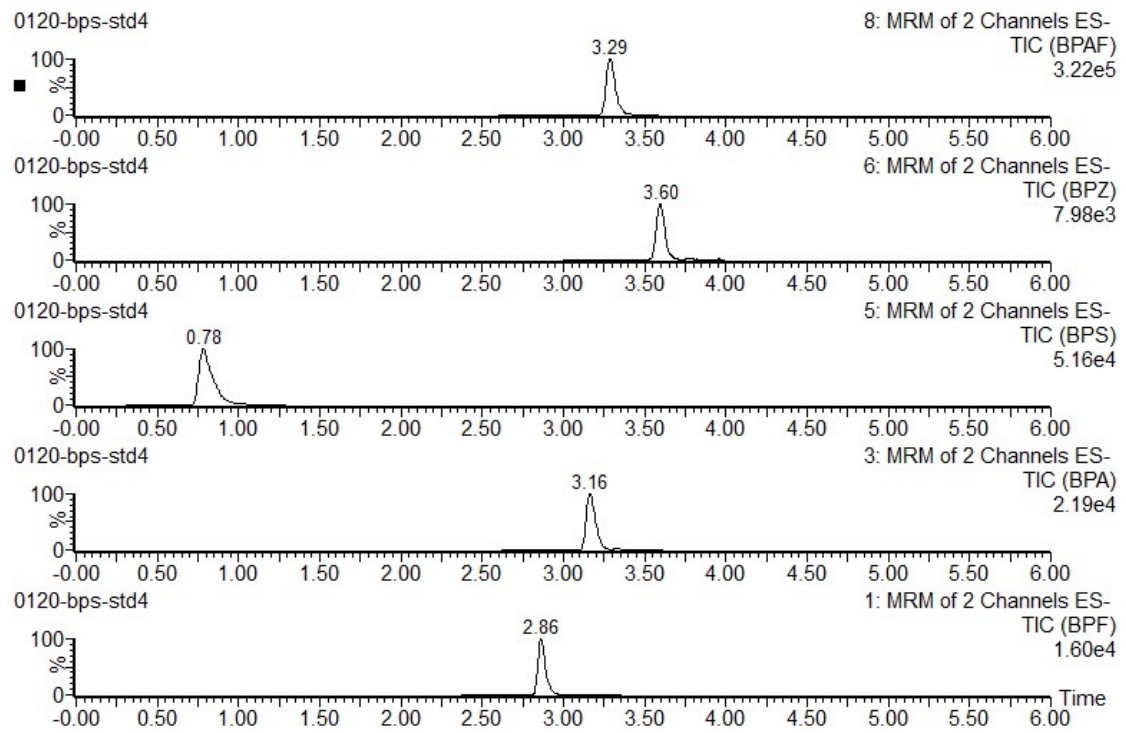

Figure S1. Representative chromatogram of BPs at concentration of 10 µg/L.

Table S1

| Sampling sites | Study area                            | Longitude (°E) | Latitude (°N) |
|----------------|---------------------------------------|----------------|---------------|
| S1             | Luting River                          | 119.89222      | 32.664112     |
| S2             | Longxi Port                           | 119.942764     | 32.57825      |
| S3             | Qinhu Lake                            | 120.080025     | 32.638935     |
| S4             | Qinhu Lake                            | 120.07943      | 32.61762      |
| S5             | Qinhu Lake                            | 120.10093      | 32.624752     |
| S6             | Jiangqin River                        | 119.91262      | 32.593544     |
| S7             | Tuanjie River-YanjingRiver            | 120.10329      | 32.68101      |
| S8             | Fengshou River-Hongmiao River         | 120.17716      | 32.586494     |
| S9             | East Jiangqin River                   | 120.13501      | 32.60366      |
| S10            | West Jianghuang River                 | 120.12988      | 32.375004     |
| S11            | Tongyang Canal                        | 119.997055     | 32.586216     |
| S12            | Huangcun River                        | 120.08544      | 32.588924     |
| S13            | Siheng River                          | 120.09579      | 32.61161      |
| S14            | New Tongyang Canal                    | 120.073        | 32.481976     |
| S15            | West Jianghuang River                 | 120.176384     | 32.456966     |
| S16            | New Shengchan River                   | 120.164474     | 32.41596      |
| S17            | East Jianghuang River                 | 120.26685      | 32.467136     |
| S18            | Nangan River                          | 120.0292202    | 32.43897906   |
| S19            | Yuejin River                          | 120.252495     | 32.411575     |
| S20            | Maoshan River                         | 119.985085     | 32.648396     |
| S21            | Taidong River                         | 120.07154      | 32.566017     |
| S22            | Taidong River                         | 120.071915     | 32.645847     |
| S23            | Zhoubian River                        | 120.072716     | 32.663445     |
| S24            | Qindong River-Yanjingkang River       | 120.096596     | 32.6514       |
| S25            | Shedong River                         | 119.86438      | 32.60696      |
| S26            | Jiangqin River                        | 120.131744     | 32.570312     |
| S27            | New Tongyang Canal                    | 120.22337      | 32.53705      |
| S28            | Tongyang Canal                        | 120.223        | 32.509064     |
| S29            | Zhoushan River                        | 120.016785     | 32.52461      |
| S30            | New Tongyang Canal                    | 120.135864     | 32.53172      |
| S31            | Zhonggan River- West Jianghuang River | 120.12737      | 32.4802       |
| S32            | Tongyang Canal                        | 120.15739      | 32.51356      |
| S33            | Nangan River                          | 120.04503      | 32.36462      |

Table S2

| <b>Time (min)</b> | <b>Composition of the mobile phase (%)</b> |                          |
|-------------------|--------------------------------------------|--------------------------|
| Negative mode     | Eluent A1 (0.01% Ammonium hydroxide)       | Eluent B1 (Acetonitrile) |
| 0                 | 90                                         | 10                       |
| 0.25              | 90                                         | 10                       |
| 3.00              | 10                                         | 90                       |
| 4.00              | 10                                         | 90                       |
| 4.01              | 90                                         | 10                       |
| 5.00              | 90                                         | 10                       |

Table S3

| <b>Compound</b> | <b>Retention time (min)</b> | <b>Parent ion (m/z)</b> | <b>Daughter ions (m/z)</b> | <b>Dwell time (s)</b> | <b>Cone voltage (v)</b> | <b>Collision energy (v)</b> |
|-----------------|-----------------------------|-------------------------|----------------------------|-----------------------|-------------------------|-----------------------------|
| BPA             | 3.16                        | 227.10                  | 133.00                     | 0.042                 | 31                      | 25                          |
|                 |                             |                         | 212.00*                    |                       |                         | 17                          |
| BPF             | 2.86                        | 199.10                  | 93.10                      | 0.042                 | 30                      | 20                          |
|                 |                             |                         | 105.10*                    |                       |                         | 20                          |
| BPS             | 0.78                        | 249.13                  | 92.05                      | 0.161                 | 42                      | 30                          |
|                 |                             |                         | 108.07*                    |                       |                         | 24                          |
| BPZ             | 3.60                        | 267.22                  | 93.02                      | 0.042                 | 56                      | 32                          |
|                 |                             |                         | 173.17*                    |                       |                         | 30                          |
| BPAF            | 3.29                        | 335.23                  | 197.10                     | 0.042                 | 32                      | 25                          |
|                 |                             |                         | 265.16*                    |                       |                         | 22                          |

\* represents quantification ion.

Table S4

| <b>Compound</b> | <b>Recovery [%] (n = 6)</b> |                 |                |                 | <b>Detection and quantitation limits (n = 3)</b> |                   |
|-----------------|-----------------------------|-----------------|----------------|-----------------|--------------------------------------------------|-------------------|
|                 | <b>Surface water</b>        |                 | <b>SPM</b>     |                 | <b>LOD (ng/L)</b>                                | <b>LOQ (ng/L)</b> |
|                 | <b>10 ng/L</b>              | <b>100 ng/L</b> | <b>10 ng/g</b> | <b>100 ng/g</b> |                                                  |                   |
| BPA             | 92.1±10.1                   | 93.1±11.2       | 119.2±17.1     | 122.7±10.4      | 2.42                                             | 8.60              |
| BPF             | 90.0±10.5                   | 93.8±9.4        | 82.4±10.5      | 93.1±14.7       | 6.63                                             | 20.74             |
| BPS             | 85.3±7.0                    | 82.4±12.3       | 75.2±5.3       | 82.7±3.5        | 1.46                                             | 5.37              |
| BPZ             | 79.2±6.6                    | 84.6±11.0       | 70.5±8.1       | 80.2±6.9        | 3.32                                             | 10.67             |
| BPAF            | 94.3±13.3                   | 92.3±6.3        | 85.2±13.6      | 92.3±17.7       | 0.50                                             | 1.70              |

Table S5

| Compound | Non-target organism     | Test Endpoint | Toxicity data (mg/L)   | PNEC (ng/L) | Reference                 | EEF Ref. (Ruan et al., 2015) |
|----------|-------------------------|---------------|------------------------|-------------|---------------------------|------------------------------|
|          | Pseudokirchneriella     | 72h-EC50      | 2.2 (Growth)           | 2200        | Debenest et al., 2010     |                              |
| BPA      | Daphnia magna           | 48h-EC50      | 3.9 (Immobility)       | 3900        | Staples et al., 1998      | $1.07 \times 10^{-4}$        |
|          | Danio rerio             | 48h-EC50      | 3.6 (Pigmentation)     | 3600        | Tişler et al., 2016       |                              |
|          | Algae                   | 96h-EC50      | 6.9                    | 6900        | US EPA, 2011 <sup>a</sup> |                              |
| BPS      | Daphnia magna           | 48h-EC50      | 55 (Immobility)        | 55000       | Chen et al., 2002         | $1.06 \times 10^{-6}$        |
|          | Zebrafish Larvae        | 72hpf-EC50    | 155 (Hatching success) | 155000      | Moreman et al., 2017      |                              |
|          | Desmodesmus subspicatus | 72h-IC50      | 22.1 (Growth)          | 22100       | Tişler et al., 2016       |                              |
| BPF      | Daphnia magna           | 21d-NOEC      | 0.84 (Reproduction)    | 8400        | Tişler et al., 2016       | $1.08 \times 10^{-4}$        |
|          | Danio rerio             | 48h-EC50      | 1.1 (Pigmentation)     | 1100        | Tişler et al., 2016       |                              |
|          | Desmodesmus subspicatus | 72h-IC50      | 3.0 (Growth)           | 3000        | Tişler et al., 2016       |                              |
| BPAF     | Daphnia magna           | 21d-NOEC      | 0.23 (Reproduction)    | 2300        | Tişler et al., 2016       | $7.23 \times 10^{-4}$        |
|          | Zebrafish Larvae        | 72hpf-EC50    | 0.92 (Mortality)       | 920         | Moreman et al., 2017      |                              |

<sup>a</sup> The toxicity data was calculated from the ecological structure activity relationships (ECOSAR) model.



Table S6

| Sampling sites | RQ for algae |        |        |        | RQ for Daphnias |        |        |        | RQ for fish |        |        |        |
|----------------|--------------|--------|--------|--------|-----------------|--------|--------|--------|-------------|--------|--------|--------|
|                | BPA          | BPF    | BPS    | BPAF   | BPA             | BPF    | BPS    | BPAF   | BPA         | BPF    | BPS    | BPAF   |
| S1             | 0.2219       | 0.0000 | 0.0048 | 0.0028 | 0.1252          | 0.0000 | 0.0006 | 0.0037 | 0.1356      | 0.0000 | 0.0002 | 0.0092 |
| S2             | 0.1406       | 0.0005 | 0.0081 | 0.0043 | 0.0793          | 0.0014 | 0.0010 | 0.0055 | 0.0859      | 0.0109 | 0.0004 | 0.0139 |
| S3             | 0.1743       | 0.0032 | 0.0067 | 0.0045 | 0.0983          | 0.0084 | 0.0008 | 0.0059 | 0.1065      | 0.0643 | 0.0003 | 0.0147 |
| S4             | 0.0718       | 0.0000 | 0.0062 | 0.0091 | 0.0405          | 0.0000 | 0.0008 | 0.0118 | 0.0439      | 0.0000 | 0.0003 | 0.0296 |
| S5             | 0.0343       | 0.0015 | 0.0024 | 0.0010 | 0.0194          | 0.0040 | 0.0003 | 0.0013 | 0.0210      | 0.0309 | 0.0001 | 0.0033 |
| S6             | 0.0698       | 0.0000 | 0.0026 | 0.0008 | 0.0394          | 0.0000 | 0.0003 | 0.0011 | 0.0426      | 0.0000 | 0.0001 | 0.0027 |
| S7             | 0.0274       | 0.0002 | 0.0005 | 0.0010 | 0.0155          | 0.0005 | 0.0001 | 0.0013 | 0.0168      | 0.0038 | 0.0000 | 0.0032 |
| S8             | 0.0271       | 0.0003 | 0.0005 | 0.0007 | 0.0153          | 0.0007 | 0.0001 | 0.0009 | 0.0166      | 0.0055 | 0.0000 | 0.0023 |
| S9             | 0.0089       | 0.0000 | 0.0034 | 0.0033 | 0.0050          | 0.0000 | 0.0004 | 0.0043 | 0.0054      | 0.0000 | 0.0002 | 0.0109 |
| S10            | 0.0105       | 0.0000 | 0.0038 | 0.0083 | 0.0059          | 0.0000 | 0.0005 | 0.0109 | 0.0064      | 0.0000 | 0.0002 | 0.0272 |
| S11            | 0.0856       | 0.0000 | 0.0067 | 0.0028 | 0.0483          | 0.0000 | 0.0008 | 0.0037 | 0.0523      | 0.0000 | 0.0003 | 0.0092 |
| S12            | 0.2502       | 0.0011 | 0.0025 | 0.0010 | 0.1412          | 0.0030 | 0.0003 | 0.0013 | 0.1529      | 0.0227 | 0.0001 | 0.0033 |
| S13            | 0.2314       | 0.0016 | 0.0047 | 0.0059 | 0.1305          | 0.0042 | 0.0006 | 0.0077 | 0.1414      | 0.0323 | 0.0002 | 0.0193 |
| S14            | 0.0625       | 0.0000 | 0.0020 | 0.0025 | 0.0353          | 0.0000 | 0.0003 | 0.0033 | 0.0382      | 0.0000 | 0.0001 | 0.0082 |
| S15            | 0.2820       | 0.0011 | 0.0099 | 0.0049 | 0.1591          | 0.0028 | 0.0012 | 0.0064 | 0.1724      | 0.0214 | 0.0004 | 0.0160 |
| S16            | 0.1723       | 0.0006 | 0.0050 | 0.0073 | 0.0972          | 0.0017 | 0.0006 | 0.0095 | 0.1053      | 0.0127 | 0.0002 | 0.0236 |
| S17            | 0.2798       | 0.0006 | 0.0088 | 0.0022 | 0.1578          | 0.0017 | 0.0011 | 0.0028 | 0.1710      | 0.0127 | 0.0004 | 0.0071 |
| S18            | 0.2461       | 0.0014 | 0.0071 | 0.0040 | 0.1388          | 0.0037 | 0.0009 | 0.0052 | 0.1504      | 0.0282 | 0.0003 | 0.0130 |
| S19            | 0.1778       | 0.0079 | 0.0071 | 0.0031 | 0.1003          | 0.0208 | 0.0009 | 0.0040 | 0.1087      | 0.1585 | 0.0003 | 0.0101 |
| S20            | 0.1581       | 0.0003 | 0.0050 | 0.0062 | 0.0892          | 0.0008 | 0.0006 | 0.0080 | 0.0966      | 0.0059 | 0.0002 | 0.0201 |
| S21            | 0.3191       | 0.0009 | 0.0073 | 0.0057 | 0.1800          | 0.0023 | 0.0009 | 0.0074 | 0.1950      | 0.0177 | 0.0003 | 0.0185 |
| S22            | 0.2925       | 0.0052 | 0.0046 | 0.0057 | 0.1650          | 0.0137 | 0.0006 | 0.0074 | 0.1788      | 0.1045 | 0.0002 | 0.0185 |
| S23            | 0.3105       | 0.0005 | 0.0121 | 0.0090 | 0.1751          | 0.0014 | 0.0015 | 0.0117 | 0.1897      | 0.0109 | 0.0005 | 0.0293 |
| S24            | 0.1616       | 0.0030 | 0.0064 | 0.0043 | 0.0912          | 0.0078 | 0.0008 | 0.0055 | 0.0988      | 0.0595 | 0.0003 | 0.0139 |
| S25            | 0.0480       | 0.0002 | 0.0011 | 0.0011 | 0.0271          | 0.0004 | 0.0001 | 0.0014 | 0.0293      | 0.0032 | 0.0000 | 0.0035 |
| S26            | 0.1693       | 0.0053 | 0.0044 | 0.0048 | 0.0955          | 0.0140 | 0.0006 | 0.0063 | 0.1035      | 0.1068 | 0.0002 | 0.0158 |
| S27            | 0.2259       | 0.0076 | 0.0086 | 0.0035 | 0.1274          | 0.0201 | 0.0011 | 0.0046 | 0.1381      | 0.1532 | 0.0004 | 0.0114 |
| S28            | 0.3114       | 0.0006 | 0.0053 | 0.0042 | 0.1756          | 0.0015 | 0.0007 | 0.0054 | 0.1903      | 0.0114 | 0.0002 | 0.0136 |
| S29            | 0.1500       | 0.0014 | 0.0107 | 0.0034 | 0.0846          | 0.0036 | 0.0013 | 0.0044 | 0.0917      | 0.0277 | 0.0005 | 0.0110 |
| S30            | 0.1050       | 0.0004 | 0.0023 | 0.0041 | 0.0592          | 0.0009 | 0.0003 | 0.0053 | 0.0642      | 0.0070 | 0.0001 | 0.0133 |
| S31            | 0.2143       | 0.0019 | 0.0025 | 0.0030 | 0.1209          | 0.0050 | 0.0003 | 0.0039 | 0.1310      | 0.0382 | 0.0001 | 0.0098 |
| S32            | 0.2584       | 0.0046 | 0.0051 | 0.0160 | 0.1458          | 0.0121 | 0.0006 | 0.0209 | 0.1579      | 0.0923 | 0.0002 | 0.0522 |
| S33            | 0.2735       | 0.0122 | 0.0088 | 0.0050 | 0.1543          | 0.0322 | 0.0011 | 0.0065 | 0.1671      | 0.2460 | 0.0004 | 0.0162 |

Yellow area represents  $0.01 < RQ < 0.1$ ,

Red area represents  $0.1 < RQ < 1$ .

**Reference:**

- ECHA (European Chemicals Agency), 2008. Guidance on Information Requirements and Chemical Safety Assessment Chapter R. 10: Characterisation of Dose [Concentration]-Response for Environment, May 2008.
- Debenest, T., Gagné, F., Petit, A.N., André, C., Kohli, M., Blaise, C., 2010. Ecotoxicity of a brominated flame retardant (tetrabromobisphenol A) and its derivatives to aquatic organisms. *Comparative Biochemistry and Physiology Part C: Toxicology & Pharmacology* 152(4), 407-412.
- Staples, C.A., Dome, P.B., Klecka, G.M., Oblock, S.T., Harris, L.R., 1998. A review of the environmental fate, effects, and exposures of bisphenol A. *Chemosphere* 36, 2149-2173.
- Tišler, T., Krel, A., Gerželj, U., Erjavec, B., Dolenc, M.S., Pintar, A., 2016. Hazard identification and risk characterization of bisphenols A, F and AF to aquatic organisms. *Environmental Pollution* 212, 472-479.
- Chen, M.Y., Ike, M., Fujita, M., 2002. Acute toxicity, mutagenicity, and estrogenicity of bisphenol-A and other bisphenols. *Environmental Toxicology* 17, 80-86.
- Moreman, J., Lee, O., Trznadel, M., David, A., Kudoh, T., Tyler, C.R., 2017. Acute toxicity, teratogenic, and estrogenic effects of bisphenol A and its alternative replacements bisphenol S, bisphenol F, and bisphenol AF in zebrafish embryo-larvae. *Environmental Science & Technology* 51, 12796-12805.
- Ruan, T., Liang, D., Song, S., Song, M., Wang, H., Jiang, G., 2015. Evaluation of the in vitro estrogenicity of emerging bisphenol analogs and their respective estrogenic contributions in municipal sewage sludge in China. *Chemosphere* 124, 150–155.
